# Supplementary material for: Remarkable enhancement of upconversion luminescence on 2-D anodic aluminum oxide photonic crystals
Source: Royal Society of Chemistry journal article supplement (doi:10.1039/c6nr00180g), 2016-01-01
Supplement: c6nr00180g1.pdf [file c6nr00180g1.pdf]

## Supporting Information

### Remarkable enhancement of upconversion luminescence on 2-D anodic aluminum oxide photonic crystals

He Wang, Ze Yin, Wen Xu, Donglei Zhou, Shaobo Cui, Xu Chen, Haining Cui, and Hongwei Song

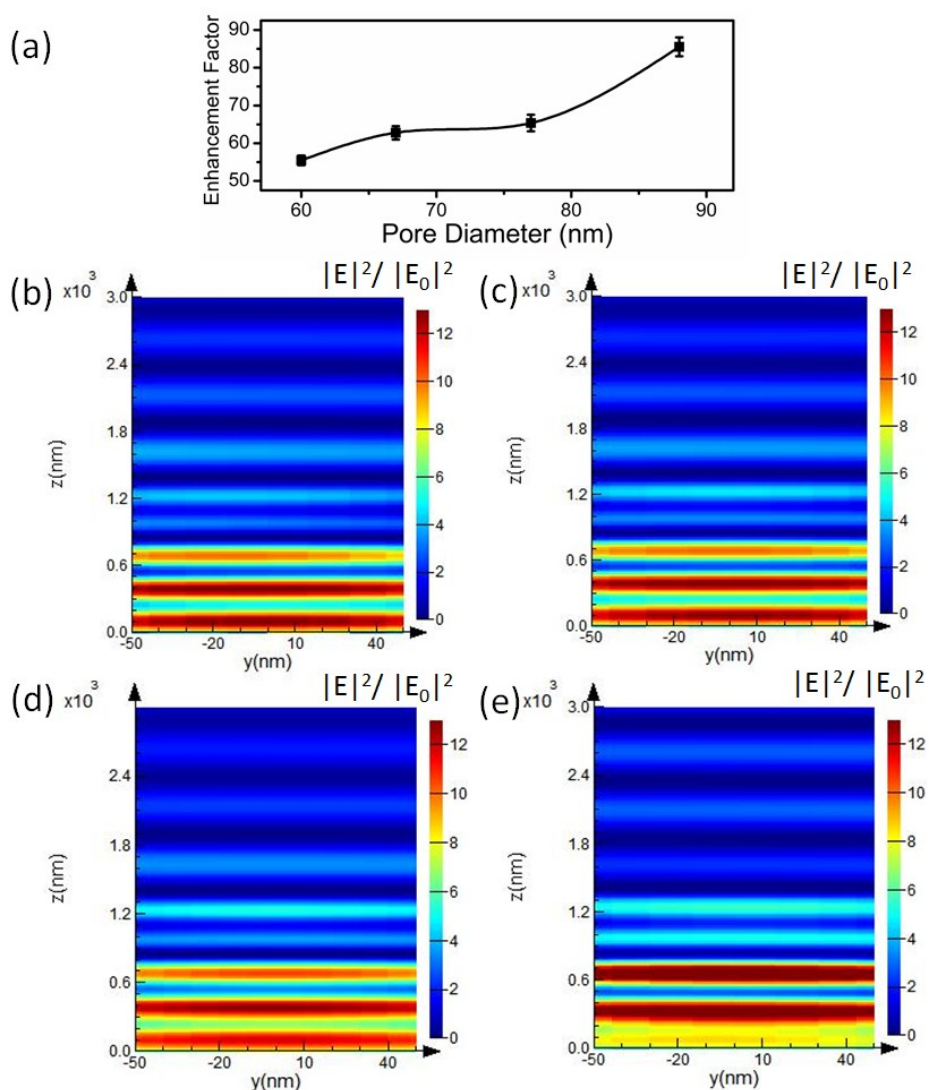

**Fig.SI.1** (a) The UCL EF versus pore diameter (the constant thickness:  $400 \pm 10$  nm) of the AAOs (the average diameter of  $\text{NaYF}_4$ : 54 nm). Simulated electromagnetic field distribution of  $\text{NaYF}_4$ :Yb, Er/AAO/Al which the AAO's pore diameter is 60 nm (b), 67 nm (c), 77 nm (d), 88 nm (e) by the FDTD method.

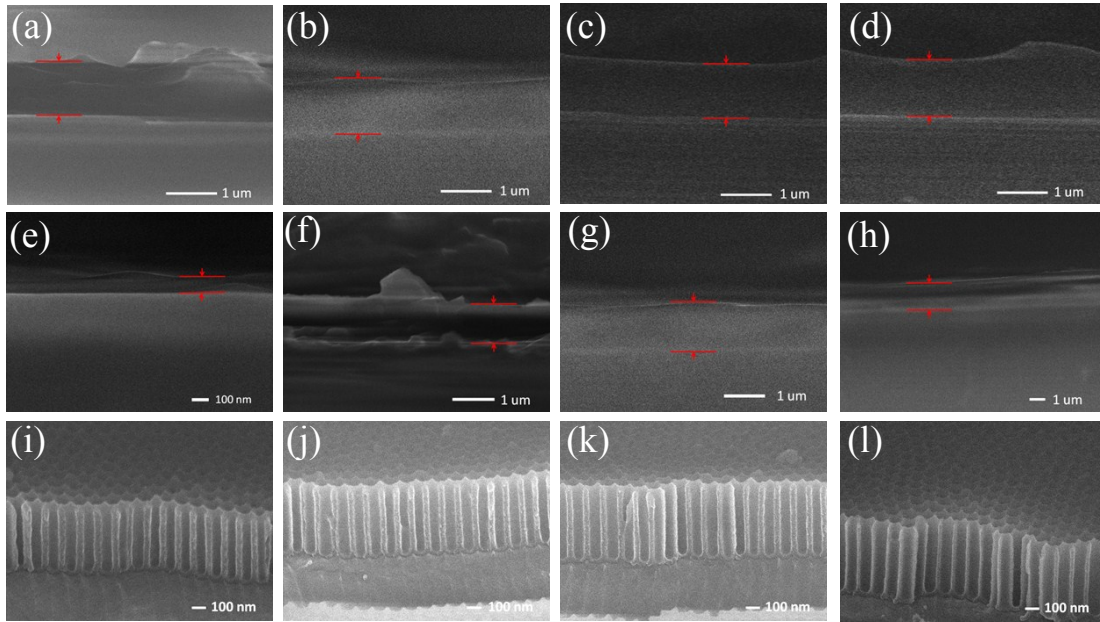

**Fig.SI.2** (a-d) The cross-section SEM images of  $\text{NaYF}_4:\text{Yb}^{3+}, \text{Er}^{3+}$  films (the samples in Fig.3 (a)) with same film thickness ( $1.3\mu\text{m}$ ) fabricated by different sizes of  $\text{NaYF}_4$ . 12nm (a), 35nm (b), 54 nm (c) and 60nm (d). (e-f) The cross-section SEM images of  $\text{NaYF}_4:\text{Yb}^{3+}, \text{Er}^{3+}$  films (the samples in Fig.3 (b)) fabricated by same size of  $\text{NaYF}_4$  (54 nm) with different film thickness 98nm (e), 957nm (f), 1332nm (g), 1644nm (h). (i-l) The cross-section SEM images of AAO films fabricated with different AAO diameters (the samples in Fig.SI.1). 60nm (i), 67nm (j), 77nm (k), 88nm (l).
